# Supplementary material for: Using Hawkes Processes to model imported and local malaria cases in near-elimination settings
Source: PubMed Central journal article supplement (PMC8043404; doi:10.1371/journal.pcbi.1008830), 2021-04-01
Supplement: pcbi.1008830.s002.pdf [file pcbi.1008830.s002.pdf]

## S2 Text: Directional derivatives of the negative log-likelihood

Our fitting process is defined as

$$\hat{\theta} = \operatorname{argmin}_{\theta \in \Theta} (-\log L(\theta)), \quad (\text{A})$$

for

$$\theta = \{\alpha, \delta, A, B, M, N\} \quad (\text{B})$$

where

$$\log L(\theta) = \sum_{i=1}^n \log \left( \mu(t_i) + \sum_{t_i > (t_j + \Delta)} \phi(t_i - (t_j + \Delta)) \right) - \int_0^{T_{\max}} \mu(\tau) d\tau - \sum_{i=1}^n \int_0^{T_{\max}} \phi(\tau - (t_i + \Delta)) d\tau, \quad (\text{C})$$

and  $\phi(\cdot)$  is the Rayleigh kernel in equation 6 of the paper and  $\mu(t)$  is given in equation 9 of the paper. We define the integral of  $\mu$  with respects to  $t$  between 0 and  $T_{\max}$  to be

$$\int_0^{T_{\max}} \mu(t) dt = \int_T A + Bt + M \cos\left(\frac{2\pi t}{p}\right) + N \sin\left(\frac{2\pi t}{p}\right) dt, \quad (\text{D})$$

where

$$T = t : A + Bt + M \cos\left(\frac{2\pi t}{p}\right) + N \sin\left(\frac{2\pi t}{p}\right) > 0. \quad (\text{E})$$

Assuming that there are a finite number of regions between 0 and  $T_{\max}$  where  $A + Bt + M \cos\left(\frac{2\pi t}{p}\right) + N \sin\left(\frac{2\pi t}{p}\right) > 0$  and each region is between  $[a_k, b_{kj}]$ ,

$$\int_0^{T_{\max}} \mu(t) dt = \sum_k \int_{a_k}^{b_k} A + Bt + M \cos\left(\frac{2\pi t}{p}\right) + N \sin\left(\frac{2\pi t}{p}\right) dt \quad (\text{F})$$

$$= \sum_k \left[ At + \frac{Bt^2}{2} + \frac{Mp}{2\pi} \sin\left(\frac{2\pi t}{p}\right) - \frac{Np}{2\pi} \cos\left(\frac{2\pi t}{p}\right) \right]_{a_k}^{b_k}. \quad (\text{G})$$

Therefore, in full

$$\begin{aligned}
& \log L(\theta) = \\
& \sum_{i=1}^n \log \left( \max \left( A + Bt_i + M \cos \left( \frac{2\pi t_i}{p} \right) + N \sin \left( \frac{2\pi t_i}{p} \right), 0 \right) \right. \\
& \left. + \sum_{t_i > (t_j + \Delta)} \alpha * (t_i - (t_j + \Delta)) e^{-\delta * (t_i - (t_j + \Delta))^2 / 2} \right) \\
& - \sum_k \left[ At + \frac{Bt^2}{2} + \frac{Mp}{2\pi} \sin \left( \frac{2\pi t}{p} \right) - \frac{Np}{2\pi} \cos \left( \frac{2\pi t}{p} \right) \right]_{a_k}^{b_k} - \sum_{i=1}^n \frac{\alpha}{\delta} \left( 1 - e^{-\delta * (T_{\max} - (t_i + \Delta))^2 / 2} \right).
\end{aligned} \tag{H}$$

We need directional derivatives of the likelihood with respect to each parameter as an input for the optimisation algorithm. These are written out below for completeness. We define

$$\zeta_i = \max \left( A + Bt_i + M \cos \left( \frac{2\pi t_i}{p} \right) + N \sin \left( \frac{2\pi t_i}{p} \right), 0 \right) + \sum_{t_i > (t_j + \Delta)} \alpha * (t_i - (t_j + \Delta)) e^{-\delta * (t_i - (t_j + \Delta))^2 / 2}. \tag{I}$$

First, we consider the directional derivatives for the kernel parameters:

$$\frac{\partial \log L(\theta)}{\partial \alpha} = \sum_{i=1}^n \frac{\sum_{t_i > (t_j + \Delta)} (t_i - (t_j + \Delta)) e^{-\delta * (t_i - (t_j + \Delta))^2 / 2}}{\zeta_i} - \sum_{i=1}^n \frac{1}{\delta} \left( 1 - e^{-\delta * (T_{\max} - (t_i + \Delta))^2 / 2} \right), \tag{J}$$

$$\begin{aligned}
\frac{\partial \log L(\theta)}{\partial \delta} &= \sum_{i=1}^n \frac{\sum_{t_i > (t_j + \Delta)} -\alpha * (t - (t_j + \Delta))^3 e^{-\delta * (t_i - (t_j + \Delta))^2 / 2}}{2\zeta_i} \\
&+ \sum_{i=1}^n \frac{\alpha}{\delta^2} \left( 1 - e^{-\delta * (T_{\max} - (t_i + \Delta))^2 / 2} \left( \frac{\delta}{2} (T_{\max} - (t_i + \Delta))^2 + 1 \right) \right).
\end{aligned} \tag{K}$$

Then we consider the directional derivatives for the  $\mu$  parameters; the first term of each directional derivatives is only evaluated at times,  $t_i$ , when  $\mu(t_i) > 0$ :

$$\frac{\partial \log L(\theta)}{\partial A} = \sum_{i=1}^n \frac{1}{\zeta_i} \Big|_{\mu(t_i) > 0} - \sum_k [t]_{a_k}^{b_k}, \tag{L}$$

$$\frac{\partial \log L(\theta)}{\partial B} = \sum_{i=1}^n \frac{t_i}{\zeta_i} \Big|_{\mu(t_i) > 0} - \sum_k \left[ \frac{t^2}{2} \right]_{a_k}^{b_k}, \tag{M}$$

$$\frac{\partial \log L(\theta)}{\partial M} = \sum_{i=1}^n \frac{\cos \left( \frac{2\pi t_i}{p} \right)}{\zeta_i} \Big|_{\mu(t_i) > 0} - \sum_k \left[ \frac{p}{2\pi} \sin \left( \frac{2\pi t}{p} \right) \right]_{a_k}^{b_k}, \tag{N}$$

$$\frac{\partial \log L(\theta)}{\partial N} = \sum_{i=1}^n \frac{\sin \left( \frac{2\pi t_i}{p} \right)}{\zeta_i} \Big|_{\mu(t_i) > 0} + \sum_k \left[ \frac{p}{2\pi} \cos \left( \frac{2\pi t}{p} \right) \right]_{a_k}^{b_k}. \tag{O}$$

The derivative of  $\mu$  with respects to  $t$  is required for the simulation so included here for completeness

$$\frac{d\mu}{dt} = \max \left( Bt - \frac{2\pi M}{p} \sin \left( \frac{2\pi t}{p} \right) + \frac{2\pi N}{p} \cos \left( \frac{2\pi t}{p} \right), 0 \right). \quad (\text{P})$$

We also provide an analytic solution for our hessian. First we consider the directional derivatives of  $\zeta_i$ .

$$\frac{\partial \zeta_i}{\partial \alpha} = \sum_{t_i > (t_j + \Delta)} (t_i - (t_j + \Delta)) e^{-\delta * (t_i - (t_j + \Delta))^2 / 2}, \quad (\text{Q})$$

$$\frac{\partial \zeta_i}{\partial \delta} = - \sum_{t_i > (t_j + \Delta)} \frac{\alpha}{2} * (t_i - (t_j + \Delta))^3 e^{-\delta * (t_i - (t_j + \Delta))^2 / 2}, \quad (\text{R})$$

$$\frac{\partial \zeta_i}{\partial A} = 1 \Big|_{\mu(t_i) > 0}, \quad (\text{S})$$

$$\frac{\partial \zeta_i}{\partial B} = t_i \Big|_{\mu(t_i) > 0}, \quad (\text{T})$$

$$\frac{\partial \zeta_i}{\partial M} = \cos \left( \frac{2\pi t_i}{p} \right) \Big|_{\mu(t_i) > 0}, \quad (\text{U})$$

$$\frac{\partial \zeta_i}{\partial N} = \sin \left( \frac{2\pi t_i}{p} \right) \Big|_{\mu(t_i) > 0}. \quad (\text{V})$$

The constituent parts of the hessian are therefore:

$$\frac{\partial^2 \log L(\theta)}{\partial \alpha^2} = - \sum_{i=1}^n \frac{\sum_{t_i > (t_j + \Delta)} (t_i - (t_j + \Delta)) e^{-\delta * (t_i - (t_j + \Delta))^2 / 2} \frac{\partial \zeta_i}{\partial \alpha}}{\zeta_i^2}, \quad (\text{W})$$

$$\frac{\partial^2 \log L(\theta)}{\partial \alpha \partial \delta} = \sum_{i=1}^n \left[ - \frac{\sum_{t_i > (t_j + \Delta)} (t_i - (t_j + \Delta)) e^{-\delta * (t_i - (t_j + \Delta))^2 / 2}}{\zeta_i} \left( \frac{(t_i - (t_j + \Delta))^2}{2} + \frac{1}{\zeta_i} \frac{\partial \zeta_i}{\partial \delta} \right) - \frac{e^{-\delta * (t_i - (t_j + \Delta))^2 / 2}}{\delta} \left( \frac{(T_{\max} - (t_i + \Delta))^2}{2} + \frac{1}{\delta} \right) + \frac{1}{\delta^2} \right], \quad (\text{X})$$

$$\frac{\partial^2 \log L(\theta)}{\partial \alpha \partial A} = - \sum_{i=1}^n \frac{\sum_{t_i > (t_j + \Delta)} (t_i - (t_j + \Delta)) e^{-\delta * (t_i - (t_j + \Delta))^2 / 2} \frac{\partial \zeta_i}{\partial A}}{\zeta_i^2}, \quad (\text{Y})$$

$$\frac{\partial^2 \log L(\theta)}{\partial \alpha \partial B} = - \sum_{i=1}^n \frac{\sum_{t_i > (t_j + \Delta)} (t_i - (t_j + \Delta)) e^{-\delta * (t_i - (t_j + \Delta))^2 / 2} \frac{\partial \zeta_i}{\partial B}}{\zeta_i^2}, \quad (\text{Z})$$

$$\frac{\partial^2 \log L(\theta)}{\partial \alpha \partial M} = - \sum_{i=1}^n \frac{\sum_{t_i > (t_j + \Delta)} (t_i - (t_j + \Delta)) e^{-\delta * (t_i - (t_j + \Delta))^2 / 2} \frac{\partial \zeta_i}{\partial M}}{\zeta_i^2}, \quad (\text{AA})$$

$$\frac{\partial^2 \log L(\theta)}{\partial \alpha \partial N} = - \sum_{i=1}^n \frac{\sum_{t_i > (t_j + \Delta)} (t_i - (t_j + \Delta)) e^{-\delta * (t_i - (t_j + \Delta))^2 / 2} \frac{\partial \zeta_i}{\partial N}}{\zeta_i^2}, \quad (\text{AB})$$

$$\frac{\partial^2 \log L(\theta)}{\partial \delta \partial \alpha} = \frac{1}{\alpha} \frac{\partial \log L(\theta)}{\partial \alpha} + \sum_{i=1}^n \frac{\alpha \sum_{t_i > (t_j + \Delta)} (t_i - (t_j + \Delta))^3 e^{-\delta^*(t_i - (t_j + \Delta))^2/2}}{2 \zeta_i^2} \frac{\partial \zeta_i}{\partial \alpha}, \quad (\text{AC})$$

$$\begin{aligned} \frac{\partial^2 \log L(\theta)}{\partial \delta^2} = \sum_{i=1}^n \alpha \left[ \frac{\sum_{t_i > (t_j + \Delta)} (t_i - (t_j + \Delta))^3 e^{-\delta^*(t_i - (t_j + \Delta))^2/2}}{2 \zeta_i} \left( \frac{(t_i - (t_j + \Delta))^2}{2} + \frac{1}{\zeta_i} \frac{\partial \zeta_i}{\partial \delta} \right) \right. \\ \left. - \frac{2}{\delta^3} \left( 1 - e^{-\delta^*(T_{\max} - (t_i + \Delta))^2/2} \right) \right. \\ \left. + \frac{(T_{\max} - (t_i + \Delta))^2 e^{-\delta^*(T_{\max} - (t_i + \Delta))^2/2}}{\delta^2} \left( 1 + \frac{\delta (T_{\max} - (t_i + \Delta))^2}{4} \right) \right], \quad (\text{AD}) \end{aligned}$$

$$\frac{\partial^2 \log L(\theta)}{\partial \delta \partial A} = \sum_{i=1}^n \frac{\alpha \sum_{t_i > (t_j + \Delta)} (t_i - (t_j + \Delta))^3 e^{-\delta^*(t_i - (t_j + \Delta))^2/2}}{2 \zeta_i^2} \frac{\partial \zeta_i}{\partial A}, \quad (\text{AE})$$

$$\frac{\partial^2 \log L(\theta)}{\partial \delta \partial B} = \sum_{i=1}^n \frac{\alpha \sum_{t_i > (t_j + \Delta)} (t_i - (t_j + \Delta))^3 e^{-\delta^*(t_i - (t_j + \Delta))^2/2}}{2 \zeta_i^2} \frac{\partial \zeta_i}{\partial B}, \quad (\text{AF})$$

$$\frac{\partial^2 \log L(\theta)}{\partial \delta \partial M} = \sum_{i=1}^n \frac{\alpha \sum_{t_i > (t_j + \Delta)} (t_i - (t_j + \Delta))^3 e^{-\delta^*(t_i - (t_j + \Delta))^2/2}}{2 \zeta_i^2} \frac{\partial \zeta_i}{\partial M}, \quad (\text{AG})$$

$$\frac{\partial^2 \log L(\theta)}{\partial \delta \partial N} = \sum_{i=1}^n \frac{\alpha \sum_{t_i > (t_j + \Delta)} (t_i - (t_j + \Delta))^3 e^{-\delta^*(t_i - (t_j + \Delta))^2/2}}{2 \zeta_i^2} \frac{\partial \zeta_i}{\partial N}, \quad (\text{AH})$$

$$\frac{\partial^2 \log L(\theta)}{\partial A \partial \alpha} = - \sum_{i=1}^n \frac{1}{\zeta_i^2} \frac{\partial \zeta_i}{\partial \alpha} \Big|_{\mu(t_i) > 0}, \quad (\text{AI})$$

$$\frac{\partial^2 \log L(\theta)}{\partial A \partial \delta} = - \sum_{i=1}^n \frac{1}{\zeta_i^2} \frac{\partial \zeta_i}{\partial \delta} \Big|_{\mu(t_i) > 0}, \quad (\text{AJ})$$

$$\frac{\partial^2 \log L(\theta)}{\partial A^2} = - \sum_{i=1}^n \frac{1}{\zeta_i^2} \frac{\partial \zeta_i}{\partial A} \Big|_{\mu(t_i) > 0}, \quad (\text{AK})$$

$$\frac{\partial^2 \log L(\theta)}{\partial A \partial B} = - \sum_{i=1}^n \frac{1}{\zeta_i^2} \frac{\partial \zeta_i}{\partial B} \Big|_{\mu(t_i) > 0}, \quad (\text{AL})$$

$$\frac{\partial^2 \log L(\theta)}{\partial A \partial M} = - \sum_{i=1}^n \frac{1}{\zeta_i^2} \frac{\partial \zeta_i}{\partial M} \Big|_{\mu(t_i) > 0}, \quad (\text{AM})$$

$$\frac{\partial^2 \log L(\theta)}{\partial A \partial N} = - \sum_{i=1}^n \frac{1}{\zeta_i^2} \frac{\partial \zeta_i}{\partial N} \Big|_{\mu(t_i) > 0}, \quad (\text{AN})$$

$$\frac{\partial^2 \log L(\theta)}{\partial B \partial \alpha} = - \sum_{i=1}^n \frac{t_i}{\zeta_i^2} \frac{\partial \zeta_i}{\partial \alpha} \Big|_{\mu(t_i) > 0}, \quad (\text{AO})$$

$$\frac{\partial^2 \log L(\theta)}{\partial B \partial \delta} = - \sum_{i=1}^n \frac{t_i}{\zeta_i^2} \frac{\partial \zeta_i}{\partial \delta} \Big|_{\mu(t_i) > 0}, \quad (\text{AP})$$

$$\frac{\partial^2 \log L(\theta)}{\partial B \partial A} = - \sum_{i=1}^n \frac{t_i}{\zeta_i^2} \frac{\partial \zeta_i}{\partial A} \Big|_{\mu(t_i) > 0}, \quad (\text{AQ})$$

$$\frac{\partial^2 \log L(\theta)}{\partial B^2} = - \sum_{i=1}^n \frac{t_i}{\zeta_i^2} \frac{\partial \zeta_i}{\partial B} \Big|_{\mu(t_i) > 0}, \quad (\text{AR})$$

$$\frac{\partial^2 \log L(\theta)}{\partial B \partial M} = - \sum_{i=1}^n \frac{t_i}{\zeta_i^2} \frac{\partial \zeta_i}{\partial M} \Big|_{\mu(t_i) > 0}, \quad (\text{AS})$$

$$\frac{\partial^2 \log L(\theta)}{\partial B \partial N} = - \sum_{i=1}^n \frac{t_i}{\zeta_i^2} \frac{\partial \zeta_i}{\partial N} \Big|_{\mu(t_i) > 0}, \quad (\text{AT})$$

$$\frac{\partial^2 \log L(\theta)}{\partial M \partial \alpha} = - \sum_{i=1}^n \frac{\cos\left(\frac{2\pi t_i}{p}\right)}{\zeta_i^2} \frac{\partial \zeta_i}{\partial \alpha} \Big|_{\mu(t_i) > 0}, \quad (\text{AU})$$

$$\frac{\partial^2 \log L(\theta)}{\partial M \partial \delta} = - \sum_{i=1}^n \frac{\cos\left(\frac{2\pi t_i}{p}\right)}{\zeta_i^2} \frac{\partial \zeta_i}{\partial \delta} \Big|_{\mu(t_i) > 0}, \quad (\text{AV})$$

$$\frac{\partial^2 \log L(\theta)}{\partial M \partial A} = - \sum_{i=1}^n \frac{\cos\left(\frac{2\pi t_i}{p}\right)}{\zeta_i^2} \frac{\partial \zeta_i}{\partial A} \Big|_{\mu(t_i) > 0}, \quad (\text{AW})$$

$$\frac{\partial^2 \log L(\theta)}{\partial M \partial B} = - \sum_{i=1}^n \frac{\cos\left(\frac{2\pi t_i}{p}\right)}{\zeta_i^2} \frac{\partial \zeta_i}{\partial B} \Big|_{\mu(t_i) > 0}, \quad (\text{AX})$$

$$\frac{\partial^2 \log L(\theta)}{\partial M^2} = - \sum_{i=1}^n \frac{\cos\left(\frac{2\pi t_i}{p}\right)}{\zeta_i^2} \frac{\partial \zeta_i}{\partial M} \Big|_{\mu(t_i) > 0}, \quad (\text{AY})$$

$$\frac{\partial^2 \log L(\theta)}{\partial M \partial N} = - \sum_{i=1}^n \frac{\cos\left(\frac{2\pi t_i}{p}\right)}{\zeta_i^2} \frac{\partial \zeta_i}{\partial N} \Big|_{\mu(t_i) > 0}, \quad (\text{AZ})$$

$$\frac{\partial^2 \log L(\theta)}{\partial N \partial \alpha} = - \sum_{i=1}^n \frac{\sin\left(\frac{2\pi t_i}{p}\right)}{\zeta_i^2} \frac{\partial \zeta_i}{\partial \alpha} \Big|_{\mu(t_i) > 0}, \quad (\text{BA})$$

$$\frac{\partial^2 \log L(\theta)}{\partial N \partial \delta} = - \sum_{i=1}^n \frac{\sin\left(\frac{2\pi t_i}{p}\right)}{\zeta_i^2} \frac{\partial \zeta_i}{\partial \delta} \Big|_{\mu(t_i) > 0}, \quad (\text{BB})$$

$$\frac{\partial^2 \log L(\theta)}{\partial N \partial A} = - \sum_{i=1}^n \frac{\sin\left(\frac{2\pi t_i}{p}\right)}{\zeta_i^2} \frac{\partial \zeta_i}{\partial A} \Big|_{\mu(t_i) > 0}, \quad (\text{BC})$$

$$\frac{\partial^2 \log L(\theta)}{\partial N \partial B} = - \sum_{i=1}^n \frac{\sin\left(\frac{2\pi t_i}{p}\right)}{\zeta_i^2} \frac{\partial \zeta_i}{\partial B} \Big|_{\mu(t_i) > 0}, \quad (\text{BD})$$

$$\frac{\partial^2 \log L(\theta)}{\partial N \partial M} = - \sum_{i=1}^n \frac{\sin\left(\frac{2\pi t_i}{p}\right)}{\zeta_i^2} \frac{\partial \zeta_i}{\partial M} \Big|_{\mu(t_i) > 0}, \quad (\text{BE})$$

$$\frac{\partial^2 \log L(\theta)}{\partial N^2} = - \sum_{i=1}^n \frac{\sin\left(\frac{2\pi t_i}{p}\right)}{\zeta_i^2} \frac{\partial \zeta_i}{\partial N} \Big|_{\mu(t_i) > 0}. \quad (\text{BF})$$
