# Supplementary material for: Using Hawkes Processes to model imported and local malaria cases in near-elimination settings
Source: PubMed Central journal article supplement (PMC8043404; doi:10.1371/journal.pcbi.1008830), 2021-04-01
Supplement: pcbi.1008830.s004.pdf [file pcbi.1008830.s004.pdf]

## S4 Text: Branching factor derivation

The branching factor,  $n^*$ , is defined as the expected number of events that are directly triggered by an event in a Hawkes process. It is defined as

$$n^* = \int_0^\infty \phi(\tau) d\tau. \quad (\text{A})$$

Substituting our intensity kernel into (A), and assuming  $\tau = t - t_i$  results in

$$\begin{aligned} n^* &= \int_0^\infty \alpha \tau e^{-\frac{\delta \tau^2}{2}} d\tau, \\ &= \left[ -\frac{\alpha}{\delta} e^{-\frac{\delta \tau^2}{2}} \right]_0^\infty, \\ &= \frac{\alpha}{\delta}. \end{aligned} \quad (\text{B})$$
