# Supplementary material for: Using Hawkes Processes to model imported and local malaria cases in near-elimination settings
Source: PubMed Central journal article supplement (PMC8043404; doi:10.1371/journal.pcbi.1008830), 2021-04-01
Supplement: pcbi.1008830.s010.pdf [file pcbi.1008830.s010.pdf]

---

---

|          | Fitted value [95% confidence interval] |
|----------|----------------------------------------|
| $\alpha$ | 0.0308 [0.0126, 0.0676]                |
| $\delta$ | 0.0789 [0.0248, 0.1681]                |
| A        | 2.1369 [-7.1932, 2.8548]               |
| B        | -0.0018 [-0.1689, -0.0014]             |
| M        | -0.5836 [-0.8269, 10.2468]             |
| N        | 0.3262 [-1.0208, 9.8495]               |

---
