# Supplementary material for: Using Hawkes Processes to model imported and local malaria cases in near-elimination settings
Source: PubMed Central journal article supplement (PMC8043404; doi:10.1371/journal.pcbi.1008830), 2021-04-01
Supplement: pcbi.1008830.s011.pdf [file pcbi.1008830.s011.pdf]

---

---

|       | Fitted value [95% confidence interval] |
|-------|----------------------------------------|
| alpha | 0.0168 [0.0031, 0.1299]                |
| delta | 0.0569 [0.0095, 2.1562]                |
| A     | 0.4001 [-0.4440, 0.5806]               |
| B     | 0.0001 [-0.0401, 0.0003]               |
| M     | 0.3045 [0.2306, 1.5897]                |
| N     | -0.1235 [-0.2143, 0.7111]              |

---
